# Supplementary material for: Alternative splicing of latrophilin-3 controls synapse formation
Source: Springer Nature journal article supplement (doi:10.1038/s41586-023-06913-9), 2024-01-17
Supplement: MOESM2 [file 41586_2023_6913_MOESM2_ESM.pdf]

Reporting Summary

Nature Portfolio wishes to improve the reproducibility of the work that we publish. This form provides structure for consistency and transparency in reporting. For further information on Nature Portfolio policies, see our [Editorial Policies](#) and the [Editorial Policy Checklist](#).

Statistics

For all statistical analyses, confirm that the following items are present in the figure legend, table legend, main text, or Methods section.

- |                                     |                                                                                                                                                                                                                                                                                                |
|-------------------------------------|------------------------------------------------------------------------------------------------------------------------------------------------------------------------------------------------------------------------------------------------------------------------------------------------|
| n/a                                 | Confirmed                                                                                                                                                                                                                                                                                      |
| <input type="checkbox"/>            | <input checked="" type="checkbox"/> The exact sample size ( <i>n</i> ) for each experimental group/condition, given as a discrete number and unit of measurement                                                                                                                               |
| <input type="checkbox"/>            | <input checked="" type="checkbox"/> A statement on whether measurements were taken from distinct samples or whether the same sample was measured repeatedly                                                                                                                                    |
| <input type="checkbox"/>            | <input checked="" type="checkbox"/> The statistical test(s) used AND whether they are one- or two-sided<br><i>Only common tests should be described solely by name; describe more complex techniques in the Methods section.</i>                                                               |
| <input checked="" type="checkbox"/> | <input type="checkbox"/> A description of all covariates tested                                                                                                                                                                                                                                |
| <input type="checkbox"/>            | <input checked="" type="checkbox"/> A description of any assumptions or corrections, such as tests of normality and adjustment for multiple comparisons                                                                                                                                        |
| <input type="checkbox"/>            | <input checked="" type="checkbox"/> A full description of the statistical parameters including central tendency (e.g. means) or other basic estimates (e.g. regression coefficient) AND variation (e.g. standard deviation) or associated estimates of uncertainty (e.g. confidence intervals) |
| <input type="checkbox"/>            | <input checked="" type="checkbox"/> For null hypothesis testing, the test statistic (e.g. <i>F</i> , <i>t</i> , <i>r</i> ) with confidence intervals, effect sizes, degrees of freedom and <i>P</i> value noted<br><i>Give P values as exact values whenever suitable.</i>                     |
| <input checked="" type="checkbox"/> | <input type="checkbox"/> For Bayesian analysis, information on the choice of priors and Markov chain Monte Carlo settings                                                                                                                                                                      |
| <input checked="" type="checkbox"/> | <input type="checkbox"/> For hierarchical and complex designs, identification of the appropriate level for tests and full reporting of outcomes                                                                                                                                                |
| <input checked="" type="checkbox"/> | <input type="checkbox"/> Estimates of effect sizes (e.g. Cohen's <i>d</i> , Pearson's <i>r</i> ), indicating how they were calculated                                                                                                                                                          |

Our web collection on [statistics for biologists](#) contains articles on many of the points above.

Software and code

Policy information about [availability of computer code](#)

|                 |                                                                                                                                                                               |
|-----------------|-------------------------------------------------------------------------------------------------------------------------------------------------------------------------------|
| Data collection | NIS-Elements AR Nikon (5.21.01)<br>Image Studio LI-COR Biosciences (5.2)<br>Leica Application Suite X (3.7.4.23463)<br>QuantStudio (3)<br>ChromLab (3.3)<br>Snappgene (6.0.2) |
|-----------------|-------------------------------------------------------------------------------------------------------------------------------------------------------------------------------|

## Data analysis

QuantStudio Design and Analysis Software (1.4.1)  
 Python (3.8.13)  
 R (4.2.2)  
 Rstudio (2022.12.0.353)  
 Fiji (2.9.0)  
 STAR aligner (2.7.9a)  
 GMAP aligner (2023-04-28)  
 HTSeq (2.0.2)  
 DESeq2 (3.17)  
 CalmAn (1.9.15)  
 Scikit-image (0.20.0)  
 FilFinder (1.7.3)  
 SciPy (1.10.1)  
 Interactive Genome Viewer (v2.16.2)

For manuscripts utilizing custom algorithms or software that are central to the research but not yet described in published literature, software must be made available to editors and reviewers. We strongly encourage code deposition in a community repository (e.g. GitHub). See the Nature Portfolio [guidelines for submitting code & software](#) for further information.

## Data

Policy information about [availability of data](#)

All manuscripts must include a [data availability statement](#). This statement should provide the following information, where applicable:

- Accession codes, unique identifiers, or web links for publicly available datasets
- A description of any restrictions on data availability
- For clinical datasets or third party data, please ensure that the statement adheres to our [policy](#)

All raw data supporting the findings of this study are deposited in the Stanford Data Repository (<https://purl.stanford.edu/nj297xj2116>), except for the high-throughput sequencing data generated from this study which was deposited at Gene Expression Omnibus repository (<https://www.ncbi.nlm.nih.gov/geo/query/acc.cgi?acc=gse240791>) with accession code GSE240791. Other public datasets analyzed in this work include: Pacbio long-read mRNA sequencing data (accession number PRJNA547800), Cell type-specific sequencing data (accession code: GSE133291, GSE115746), Neuronal activity regulated transcriptome datasets (accession number: GSE175965, GSE104802, GSE152632).

## Research involving human participants, their data, or biological material

Policy information about studies with [human participants or human data](#). See also policy information about [sex, gender \(identity/presentation\), and sexual orientation](#) and [race, ethnicity and racism](#).

Reporting on sex and gender

Reporting on race, ethnicity, or other socially relevant groupings

Population characteristics

Recruitment

Ethics oversight

Note that full information on the approval of the study protocol must also be provided in the manuscript.

## Field-specific reporting

Please select the one below that is the best fit for your research. If you are not sure, read the appropriate sections before making your selection.

☒ Life sciences ☐ Behavioural & social sciences ☐ Ecological, evolutionary & environmental sciences

For a reference copy of the document with all sections, see [nature.com/documents/nr-reporting-summary-flat.pdf](https://nature.com/documents/nr-reporting-summary-flat.pdf)

## Life sciences study design

All studies must disclose on these points even when the disclosure is negative.

Sample size

Data exclusions

|               |                                                                                                                                                                                                                                                                                                                      |
|---------------|----------------------------------------------------------------------------------------------------------------------------------------------------------------------------------------------------------------------------------------------------------------------------------------------------------------------|
| Replication   | All results were independently replicated at least 3 times, as described in the figure legends.                                                                                                                                                                                                                      |
| Randomization | Postnatal day 0 mouse pups were randomly chosen for making primary hippocampal cultures. Different litters of animals receive the same injection of lentivirus (control, Lphn3 KO, or Exon31 KO). In culture experiments, cover slips were assigned randomly.                                                        |
| Blinding      | Data collection and analysis for TRUPATH/cAMP assay, calcium imaging, synapse puncta and rabies tracing experiments were blinded. All other experiments and analysis were not blinded, because blinding to sample group allocation is not typically relevant to biochemical and high-throughput sequencing analyses. |

## Reporting for specific materials, systems and methods

We require information from authors about some types of materials, experimental systems and methods used in many studies. Here, indicate whether each material, system or method listed is relevant to your study. If you are not sure if a list item applies to your research, read the appropriate section before selecting a response.

### Materials & experimental systems

| n/a                                 | Involved in the study                                           |
|-------------------------------------|-----------------------------------------------------------------|
| <input type="checkbox"/>            | <input checked="" type="checkbox"/> Antibodies                  |
| <input type="checkbox"/>            | <input checked="" type="checkbox"/> Eukaryotic cell lines       |
| <input checked="" type="checkbox"/> | <input type="checkbox"/> Palaeontology and archaeology          |
| <input type="checkbox"/>            | <input checked="" type="checkbox"/> Animals and other organisms |
| <input checked="" type="checkbox"/> | <input type="checkbox"/> Clinical data                          |
| <input checked="" type="checkbox"/> | <input type="checkbox"/> Dual use research of concern           |
| <input checked="" type="checkbox"/> | <input type="checkbox"/> Plants                                 |

### Methods

| n/a                                 | Involved in the study                           |
|-------------------------------------|-------------------------------------------------|
| <input checked="" type="checkbox"/> | <input type="checkbox"/> ChIP-seq               |
| <input checked="" type="checkbox"/> | <input type="checkbox"/> Flow cytometry         |
| <input checked="" type="checkbox"/> | <input type="checkbox"/> MRI-based neuroimaging |

## Antibodies

|                 |                                                                                                                                                                                                                                                                                                                                                                                                                                                                                                                                                                                                                                                                |
|-----------------|----------------------------------------------------------------------------------------------------------------------------------------------------------------------------------------------------------------------------------------------------------------------------------------------------------------------------------------------------------------------------------------------------------------------------------------------------------------------------------------------------------------------------------------------------------------------------------------------------------------------------------------------------------------|
| Antibodies used | Primary antibodies: anti-MAP2 chicken (1:1000, Encor #CPCA-MAP2), anti-vGluT1 guinea pig (1:1000, Millipore #AB5905), anti-Homer1 rabbit (1:1000, Millipore #ABN37), anti-actin mouse (1:1000, Sigma #A1978), anti-Lphn3 mouse (1:1000, SCBT #sc-393576). Secondary antibodies: anti-chicken (1:1000 Alexa 405 ThermoFisher #A48260), anti-rabbit (1:1000 Alexa 488 ThermoFisher #A-11034), anti-guinea pig (1:1000 Alexa 647 ThermoFisher #A-21450), anti-mouse (1:20000, IRDye 800CW, Licor)                                                                                                                                                                 |
| Validation      | anti-MAP2 is widely used and sold through many vendors, see for example the results of Google Scholar search for CPCA-MAP2 ( <a href="https://scholar.google.com/scholar?as_sdt=0%2C10&amp;hl=en&amp;inst=5746887945952177237&amp;q=cpc-map2">https://scholar.google.com/scholar?as_sdt=0%2C10&amp;hl=en&amp;inst=5746887945952177237&amp;q=cpc-map2</a> ). anti-vGluT1 guinea pig, anti-Homer 1 rabbit and anti-actin were validated in previous paper (doi: 10.1523/JNEUROSCI.0454-20.2020). anti-Lphn3 was validated by the provider ( <a href="https://www.scbt.com/p/latrophilin-3-antibody-b-6">https://www.scbt.com/p/latrophilin-3-antibody-b-6</a> ). |

## Eukaryotic cell lines

Policy information about [cell lines and Sex and Gender in Research](#)

|                                                                   |                                                                                            |
|-------------------------------------------------------------------|--------------------------------------------------------------------------------------------|
| Cell line source(s)                                               | HEK 293T (ATCC #CRL-11268)                                                                 |
| Authentication                                                    | HEK 293T cell was not authenticated since it was directly purchased from ATCC (#CRL-11268) |
| Mycoplasma contamination                                          | Cell lines were tested negative for mycoplasma contamination using PCR.                    |
| Commonly misidentified lines (See <a href="#">ICLAC</a> register) | None of the cell lines used is listed as commonly misidentified                            |

## Animals and other research organisms

Policy information about [studies involving animals](#); [ARRIVE guidelines](#) recommended for reporting animal research, and [Sex and Gender in Research](#)

|                         |                                                                                                                                                                                                                                                                          |
|-------------------------|--------------------------------------------------------------------------------------------------------------------------------------------------------------------------------------------------------------------------------------------------------------------------|
| Laboratory animals      | CRISPR/CAS9 knockin mice (Jax stock no: 02485) and C57BL/6 mice (Jax stock no: 000664) were obtained from Jackson Laboratory. P0 pups were used for hippocampal culture experiments; P0, P21 and P35 mice were injected with viruses for the rabies tracing experiments. |
| Wild animals            | This study did not use wild animal.                                                                                                                                                                                                                                      |
| Reporting on sex        | Sex was not considered in this study design.                                                                                                                                                                                                                             |
| Field-collected samples | This study did not use field-collected samples                                                                                                                                                                                                                           |

## Ethics oversight

All mice described in this study were maintained using established procedures according to protocols approved by the Stanford University Administrative Panel on Laboratory Animal Care.

Note that full information on the approval of the study protocol must also be provided in the manuscript.
